1 **TGF $\beta$  signaling is required for tenocyte recruitment and functional neonatal tendon regeneration**

2

3 Deepak A. Kaji<sup>1</sup>, Kristen L. Howell<sup>1</sup>, Alice H. Huang<sup>1</sup>

4

5 <sup>1</sup> Department of Orthopaedics, Icahn School of Medicine at Mount Sinai, New York, NY 10029

6

7

8

9

10

11

12

13

14

15

16

17

18

19

20

21

22

23

24

25

26

27

28

29

30 **Corresponding Author:**

31

32 Alice Huang, PhD

33 Associate Professor

34 Dept of Orthopaedics, Icahn School of Medicine at Mount Sinai

35 1 Gustave Levy Pl, Box 1188

36 NY, NY 10029

37

38 Phone: (212) 241-1158

39 Email: [alice.huang@mssm.edu](mailto:alice.huang@mssm.edu)

40

41

42

43 **Date:** 9/10/2019

44 **Keywords:** tendon healing, regeneration, TGF $\beta$ , mouse

45 **Running Title:** TGF $\beta$  is required for tendon regeneration

46

47

48 **ABSTRACT**

49 Tendon injuries are common with poor healing potential. The paucity of therapies for tendon is due to  
50 our limited understanding of the cells and molecules that drive tendon regeneration. Using a model of  
51 neonatal mouse tendon regeneration, we determined the molecular basis for regeneration and identify  
52 TGF $\beta$  signaling as a major pathway. Through targeted gene deletion, small molecule inhibition, and  
53 lineage tracing, we elucidated TGF $\beta$ -dependent and -independent mechanisms underlying tendon  
54 regeneration. Importantly, functional recovery depended on TGF $\beta$  signaling and loss of function is due  
55 to impaired tenogenic cell recruitment from both *Scx*<sup>lin</sup> and non-*Scx*<sup>lin</sup> sources. We show that TGF $\beta$   
56 signaling is required directly in neonatal tenocytes for recruitment and that TGF $\beta$  is positively regulated  
57 in tendons. Collectively, these results are the first to show a functional role for TGF $\beta$  signaling in tendon  
58 regeneration and offer new insights toward the divergent cellular activities that may lead to  
59 regenerative vs fibrotic healing.

60

61

## 62 INTRODUCTION

63 Tendons connect muscle to bone and function to transmit muscle forces to the skeleton. Tendon  
64 function is enabled by a specialized extracellular matrix composed of highly aligned type 1 collagen  
65 fibrils (Voleti, Buckley, & Soslowsky, 2012). Although healthy tendon can normally resist high mechanical  
66 loads, mechanical properties are permanently impaired after injury due to its minimally regenerative  
67 potential (Voleti et al., 2012). This loss of function can lead to chronic pain, decreased quality of life, and  
68 increased risk of re-rupture. Current treatment options remain limited and there are almost no cell or  
69 biological treatments to improve tendon repair or induce regeneration.

70 To date, the majority of models for tendon healing are models of scar-mediated healing since adult  
71 tendon does not regenerate (Ackerman et al., 2019; Dymment et al., 2014; Dymment et al., 2013; Howell et  
72 al., 2017; Katzel et al., 2011; Kim et al., 2011; Mass & Tuel, 1991). Although a few groups showed  
73 successful tendon regeneration in model systems such as fetal sheep and MRL/MpJ mice, genetic  
74 manipulation is relatively challenging in these model systems (Beredjikian et al., 2003; Paredes, Shiovitz,  
75 & Andarawis-Puri, 2018). To overcome these limitations, we previously established a model of tendon  
76 regeneration using neonatal mice, that can be directly compared to adult mice within the same genetic  
77 background (Howell et al., 2017). Using lineage tracing, we found that neonatal tendon regeneration is  
78 driven by tendon cell proliferation, recruitment, and differentiation leading to full functional restoration.  
79 In contrast, adult tendon healing is defined by the persistent presence of myofibroblasts, absence of  
80 tendon cell proliferation or recruitment, abnormal cartilage differentiation, and loss of functional  
81 properties. Having identified these cellular processes distinguishing neonatal tendon healing from adult,  
82 we now focus on the molecular pathways that regulate neonatal tendon regeneration.

83 Although FGF signaling was first established in chick tendon development (Brent, Schweitzer, & Tabin,  
84 2003), the TGF $\beta$  pathway subsequently emerged as the most important signaling pathway identified for  
85 mammalian tendon formation (Havis et al., 2016; Kuo, Petersen, & Tuan, 2008; Brian A. Pryce et al.,  
86 2009). Signaling through the TGF $\beta$  superfamily of molecules is mediated by ligand binding to type II  
87 receptors and dimerization with type I receptors. The receptors then phosphorylate intracellular Smad  
88 transcription factors that complex with the co-Smad, Smad4, to effect transcriptional change (Shi &  
89 Massague, 2003). In mouse embryos, TGF $\beta$  ligands are expressed by tendon cells and genetic deletion of  
90 the TGF $\beta$  type II receptor (T $\beta$ R2) or TGF $\beta$  ligands results in a total loss of tendons (Havis et al., 2016; Kuo  
91 et al., 2008; Brian A. Pryce et al., 2009). TGF $\beta$  also induces expression of the tendon transcription factor,  
92 *Scleraxis* (*Scx*), in a variety of contexts including embryonic limb explants, mesenchymal stem cells, and  
93 tendon-derived cells (Brown, Galassi, Stoppato, Schiele, & Kuo, 2015; Maeda et al., 2011; Brian A. Pryce  
94 et al., 2009).

95 In addition to its essential role in tendon development and tendon cell differentiation, TGF $\beta$  is also a  
96 known inducer of fibrotic scar formation in diverse tissues, including adult tendon (Katzel et al., 2011;  
97 Kim et al., 2011; Thomopoulos, Parks, Rifkin, & Derwin, 2015). TGF $\beta$  is well established in myofibroblast  
98 activation (Border & Noble, 1994; Desmouliere, Geinoz, Gabbiani, & Gabbiani, 1993) and excessive  
99 release of TGF $\beta$ s after injury can also induce tendon cell death (Maeda et al., 2011). Given these  
100 contradictory roles of TGF $\beta$  signaling in both tendon differentiation and scar formation, it is unclear  
101 whether TGF $\beta$  signaling enacts a positive or negative response in the context of tendon regeneration.  
102 Therefore, in this study, we determined the requirement for TGF $\beta$  signaling in neonatal tendon  
103 regeneration. Using small molecule inhibition and genetic deletion experiments, we identified a role for  
104 TGF $\beta$  in functional regeneration and tenogenic cell recruitment from both *Scx* and non-*Scx* lineages.

105 **RESULTS**

106 TGF $\beta$  signaling is activated after neonatal injury

107 To determine whether TGF $\beta$  signaling is activated after neonatal injury, we evaluated the expression of  
 108 TGF $\beta$  ligands (TGF $\beta$ 1, 2, 3) as well as the TGF $\beta$  type II receptor (T $\beta$ R2) at d3, d7, d14, and d28 post-injury  
 109 by qPCR. T $\beta$ R2 was expressed at all time points after injury and upregulated in injured tendons relative  
 110 to uninjured controls at d7 and d28 ( $p < 0.01$ ) (**Figure 1A**). TGF $\beta$ 1 and TGF $\beta$ 2 expression levels were  
 111 transiently upregulated at alternating timepoints, however overall expression levels were quite low for  
 112 TGF $\beta$ 2 expression (several fold lower than TGF $\beta$ s 1 and 3), suggesting a relatively minor role in  
 113 regeneration for this ligand. By contrast, TGF $\beta$ 3 expression was increased at all timepoints relative to  
 114 control (**Figure 1A**). To confirm active TGF $\beta$  signaling, western blot was carried out for T $\beta$ R2 and  
 115 phospho-Smad2/3. Consistent with gene expression results, we found enhanced T $\beta$ R2 and phospho-  
 116 Smad2/3 protein in injured tendons at d14, suggesting active TGF $\beta$  signaling (**Figure 1B**). Collectively,  
 117 these results suggest a potential role for TGF $\beta$  signaling in neonatal tendon regeneration and suggest  
 118 that most of the signaling may be driven by TGF $\beta$ s 1 and 3.

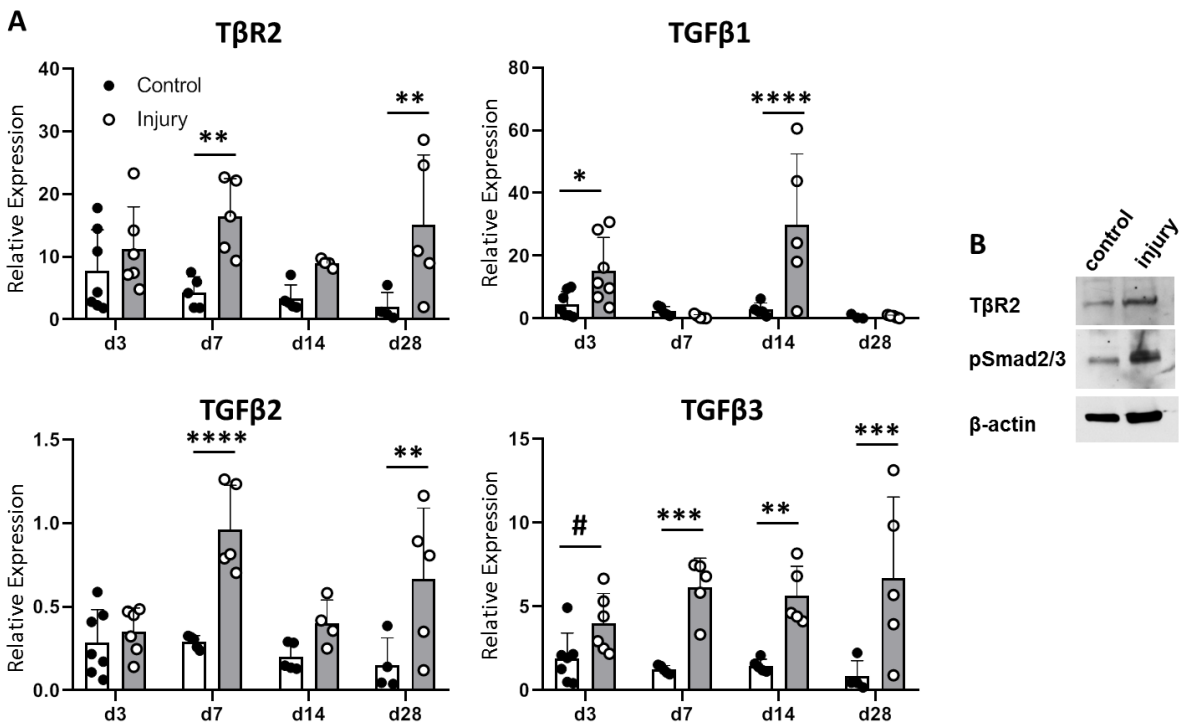

119

120 **Figure 1: TGF $\beta$  signaling is activated after neonatal tendon injury.** (A) Gene expression of control and  
 121 injured tendons at d3, d7, d14, and d28 post-injury by qPCR showed upregulation of TGF $\beta$  signaling  
 122 molecules. Expression levels were normalized to *Gapdh* using standard curve method ( $n=5-7$  mice). (B)  
 123 Western blot of control and injured tendons at d14 showed enhanced phospho-Smad2/3 after injury  
 124 indicating active TGF $\beta$  signaling (3 tendons combined). \*  $p < 0.05$ , \*\*  $p < 0.01$ , \*\*\*  $p < 0.001$ .

125

126

127 TGF $\beta$  signaling is required for full functional regeneration

128 To test the requirement for TGF $\beta$  signaling in functional restoration, we inhibited TGF $\beta$  signaling for 14  
129 days using the small molecule inhibitor SB-431542, which targets the TGF $\beta$  family type I receptors ALK  
130 4/5/7. Pups treated with the inhibitor showed no adverse effects in growth compared to carrier-treated  
131 pups and tendons appeared grossly normal (**Figure S1**). In a previous study, we determined that the  
132 parameters for the brake and propel phases of gait were highly associated with Achilles tendon function  
133 (Howell et al., 2017). Carrier-treated mice fully recovered % brake and % propel gait parameters by d14,  
134 consistent with functional recovery (**Figure 2A**). By contrast, both % brake and % propel were impaired  
135 relative to the contralateral control limb with SB-431542 treatment. We also observed a significant  
136 decrease in % propel stride relative to the injured limb of carrier-treated animals. Defects in whole limb  
137 gait persisted at d28 for both parameters despite cessation of inhibitor treatment from d14-d28 (**Figure**  
138 **2B**).

139 To determine the mechanical properties of the healing tissue directly, we then performed tensile testing  
140 of the tendons at d28 and observed a reduction in stiffness and max force with SB-431542 treatment  
141 (**Figure 2C**). Mechanical properties in uninjured control tendons were not significantly different, further  
142 indicating that postnatal growth was not impaired with TGF $\beta$  inhibition (**Figure S1**). Taken together,  
143 these data show that TGF $\beta$  is required in the first 14 days of healing for functional regeneration.

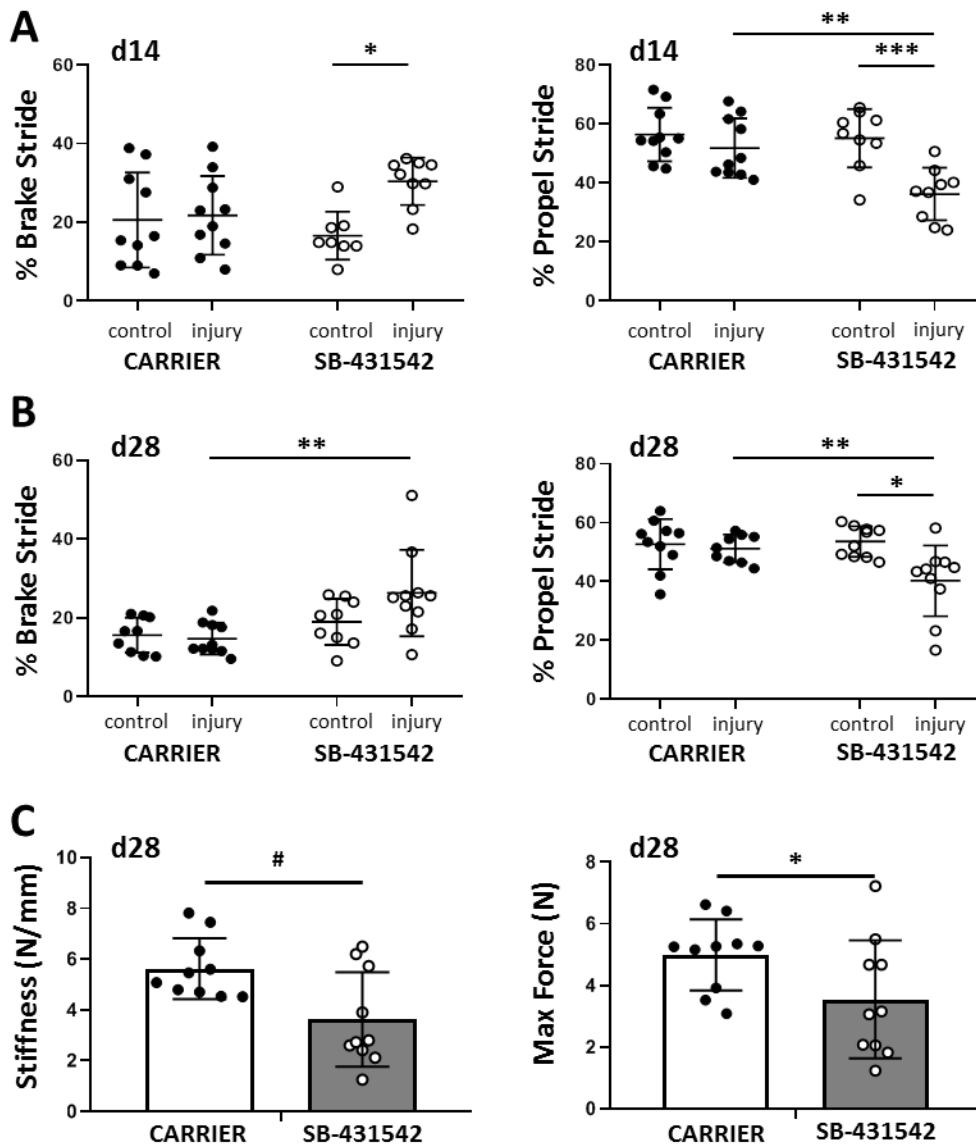

144

145 **Figure 2: TGFβ signaling is required for functional recovery.** Gait analysis at (A) d14 and (B) d28 showed  
 146 impaired % brake stride and % propel stride after injury with SB-431542 treatment. (C) Tensile testing  
 147 revealed reduced stiffness and max force with SB-431542 treatment. # p<0.1, \* p<0.05, \*\* p<0.01, \*\*\*  
 148 p<0.001 (n=8-10 mice).

149

150 TGFβ signaling in neonatal tenocytes is required for cell recruitment after injury

151 We previously found that *Scx*-lineage (*Scx<sup>flin</sup>*) tenocyte proliferation, recruitment, and differentiation are  
 152 unique features of the neonatal regenerative response that are not observed during adult healing  
 153 (Howell+, Sci Rep, 2017). To first assess whether tenocyte recruitment is affected by TGFβ inhibition, we  
 154 used the *ScxCreERT2* mouse to genetically label differentiated tenocytes prior to injury and traced the  
 155 fate of these cells during healing when TGFβ signaling is suppressed. In carrier-treated mice, whole

156 mount imaging of hindlimbs showed  $Scx^{lin}$  cells ( $RosaT+$ ) occupying the gap space between the original  
 157 Achilles tendon stubs at d14 (**Figure 3A**), while little  $RosaT$  signal was detected in SB-431542-treated  
 158 limbs (**Figure 3B**). Quantification of transverse sections taken from the midsubstance regions confirmed  
 159 reduced  $Scx^{lin}$  tenocyte numbers with TGF $\beta$  inhibition (**Figure 3C,3D**).

160 Since SB-431542 treatment indiscriminantly targets all cells, we next tested whether neonatal tenocytes  
 161 directly required TGF $\beta$  signaling for their recruitment. We therefore deleted  $T\beta R2$  using  $ScxCreERT2$   
 162 prior to injury ( $T\beta R2^{Scx}$ ) and visualized mutant cells by  $RosaT$  expression. Since TGF $\beta$  signaling is  
 163 mediated by a single type II receptor ( $T\beta R2$ ), all TGF $\beta$  signaling is abolished with deletion of this  
 164 receptor. Consistent with our inhibitor studies, few  $Scx^{lin}$  tenocytes were detected in the midsubstance  
 165 of  $T\beta R2^{Scx}$  mutant tendons compared to  $ScxCreERT2$  wild type tendons (**Figure 3F-3H**). This data suggests  
 166 that TGF $\beta$  signaling is required in neonatal tenocytes for recruitment, rather than an indirect effect of  
 167 TGF $\beta$  inhibition.

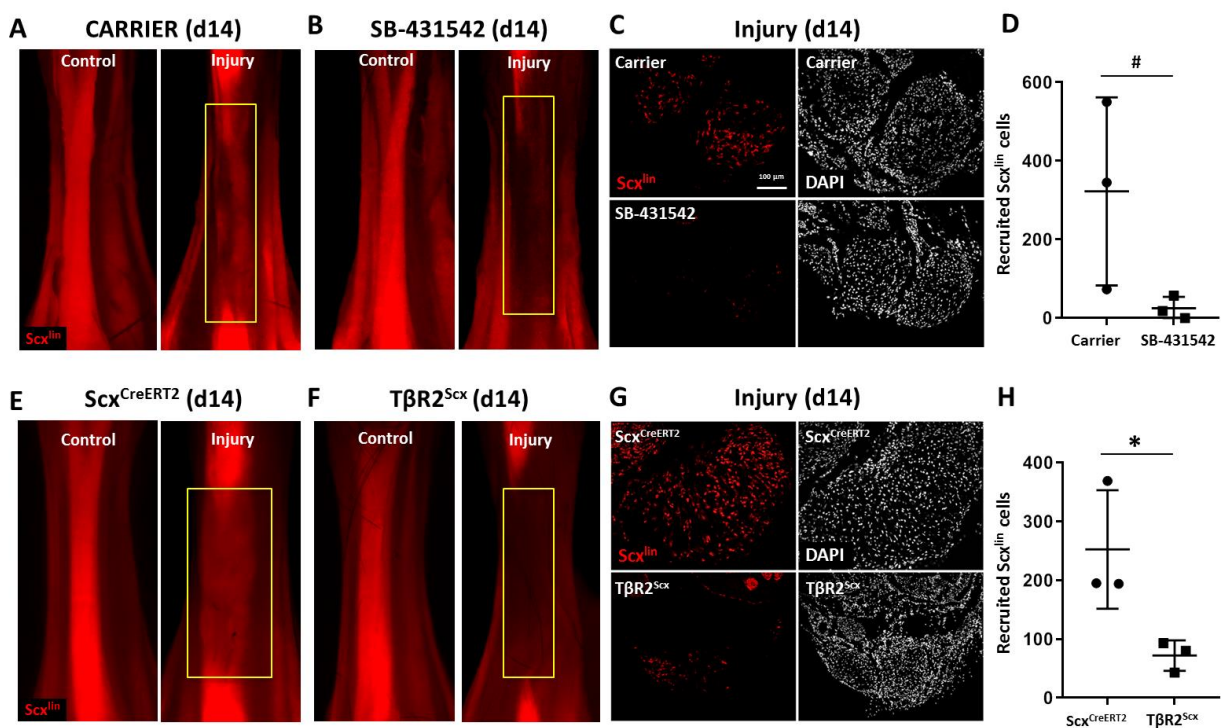

168  
 169 **Figure 3: TGF $\beta$  signaling is required for tenocyte recruitment.** (A, B) Whole mount images of control  
 170 and injured limbs in carrier-treated and SB-431542-treated  $ScxCreERT2/RosaT$  mice. (C) Transverse sections  
 171 through the neo-tendon (yellow boxes) near the mid-substance and (D) quantification showed reduced  
 172  $Scx^{lin}$ ,  $RosaT+$  cell recruitment with SB-431542 treatment (n=3 mice). (E, F) Whole mount images of  
 173 control and injured limbs in wild type  $ScxCreERT2/RosaT$  and  $T\beta R2^{Scx}/RosaT$  mice. (G) Transverse sections  
 174 through the neo-tendon near the mid-substance and (H) quantification showed reduced  $Scx^{lin}$ ,  $RosaT+$   
 175 cell recruitment in  $T\beta R2^{Scx}$  mutants (n=3 mice). \*  $p < 0.05$ , #  $p < 0.10$ . Scalebars: 100  $\mu$ m.

#### 176 TGF $\beta$ signaling is required for tenocyte migration but not proliferation

177 We hypothesized that the absence of  $Scx^{lin}$  cell recruitment at d14 with TGF $\beta$  inhibition may be due to a  
 178 defect in cell proliferation at an earlier timepoint. In a previous study, we showed intense  $Scx^{lin}$  tenocyte  
 179 proliferation that was localized at the cut site of tendon stubs at d3. To test this hypothesis, we collected

180 *ScxCreERT2*-labeled limbs at d3 post-injury with SB-431542 treatment as well as *TBR2<sup>Scx</sup>* deletion.  
 181 Consistent with previous findings, transverse sections through the midsubstance gap space confirmed  
 182 that *Scx<sup>lin</sup>* cells were not detectable at d3 after injury for any condition (not shown). EdU staining of  
 183 proliferating *Scx<sup>lin</sup>* tendon cells showed comparable numbers between carrier-treated and SB-431542-  
 184 treated mice after injury (**Figure 4A-C**). Similarly, no differences were detected between injured, wild  
 185 type and *TBR2<sup>Scx</sup>* mutants (**Figure 4D-F**). At this timepoint, tenocyte proliferation in uninjured control  
 186 Achilles tendons was extremely low (0-1 EdU+/*Scx<sup>lin</sup>*+ cell per section) and was unaffected by SB-431542  
 187 treatment or *TBR2<sup>Scx</sup>* deletion (**Figure S2**).

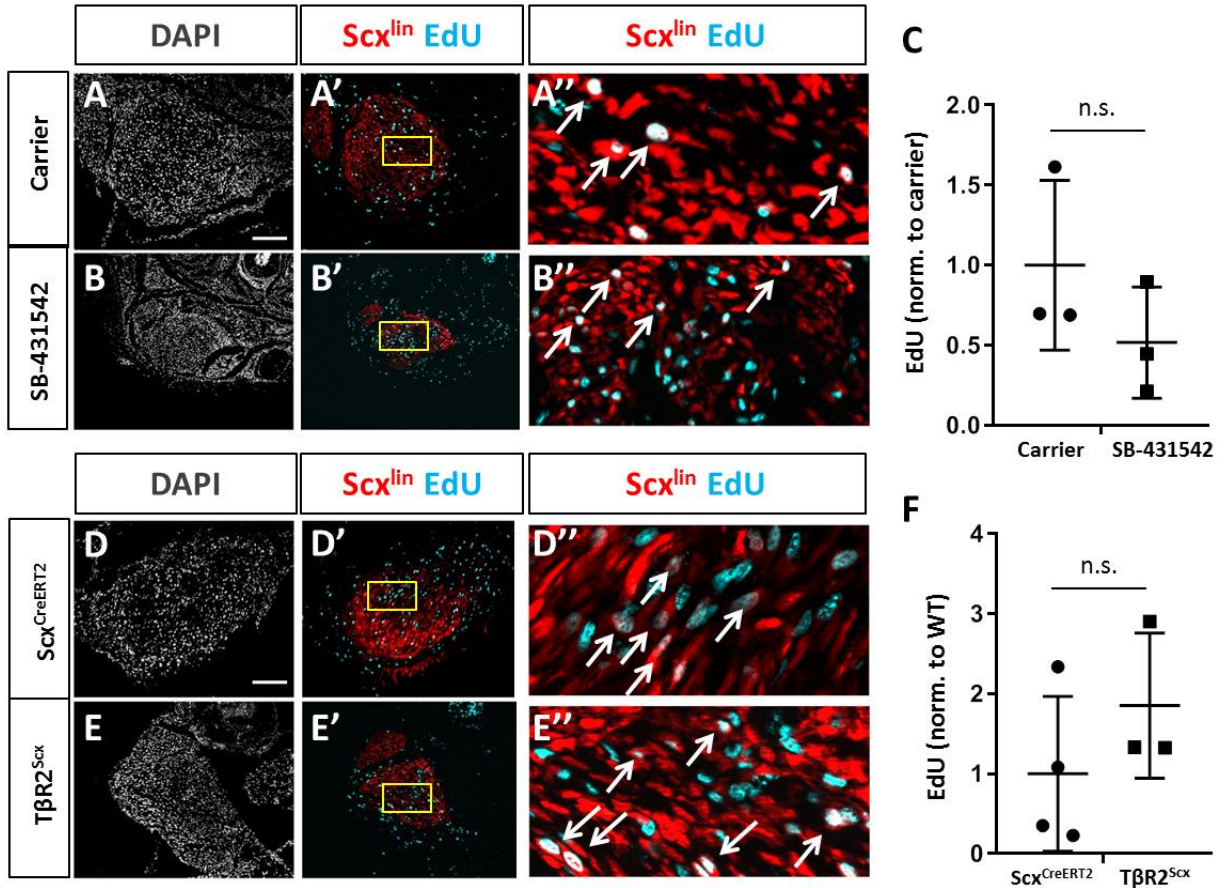

188 **Figure 4: TGFβ signaling is not required for tenocyte proliferation.** Transverse sections through the cut  
 189 site of (A, A', A'') carrier-treated injured tendon or (B, B', B'') SB-431542-treated injured tendon stained  
 190 for EdU and counterstained with DAPI. A'', B'', D'', E'' are enlarged images from yellow boxed regions  
 191 shown in A', B', C', D'. (C) Quantification of EdU and *Scx<sup>lin</sup>* overlays showed no difference in *Scx<sup>lin</sup>* cell  
 192 proliferation after injury with TGFβ inhibition (n=3 mice). Transverse sections through the cut site of (D,  
 193 D', D'') wild type injured tendon or (E, E', E'') *TBR2<sup>Scx</sup>* injured tendon stained for EdU and counterstained  
 194 with DAPI. (F) Quantification of EdU and *Scx<sup>lin</sup>* overlays show no difference in *Scx<sup>lin</sup>* cell proliferation  
 195 after injury with *TBR2* deletion (n=3 mice). White arrows indicate EdU+, *Scx<sup>lin</sup>* cells. n.s. indicates p>0.1.  
 196 Scalebars: 100 μm.

198



199 Since proliferation was not affected, we next determined whether TGF $\beta$  signaling may be required for  
200 tenocyte migration. *In vitro* wounds were created in cell monolayers and migration of cells into the  
201 defect observed over 12 hours (**Figure 5A**). Tenocytes in DMEM alone did not migrate at any timepoint.  
202 Differences in wound closure were not observed between DMEM and DMEM+FBS until 12 hours. In  
203 contrast, the addition of TGF $\beta$ 1 significantly enhanced cell migration, and differences in wound closure  
204 were detected as early as 4 hours with nearly full wound closure by 8 hours (**Figure 5A, B**).

205 Collectively, these results suggest that TGF $\beta$  signaling is required in neonatal tenocytes for cell  
206 recruitment, and that recruitment occurs by active cell migration rather than growth through  
207 proliferation.

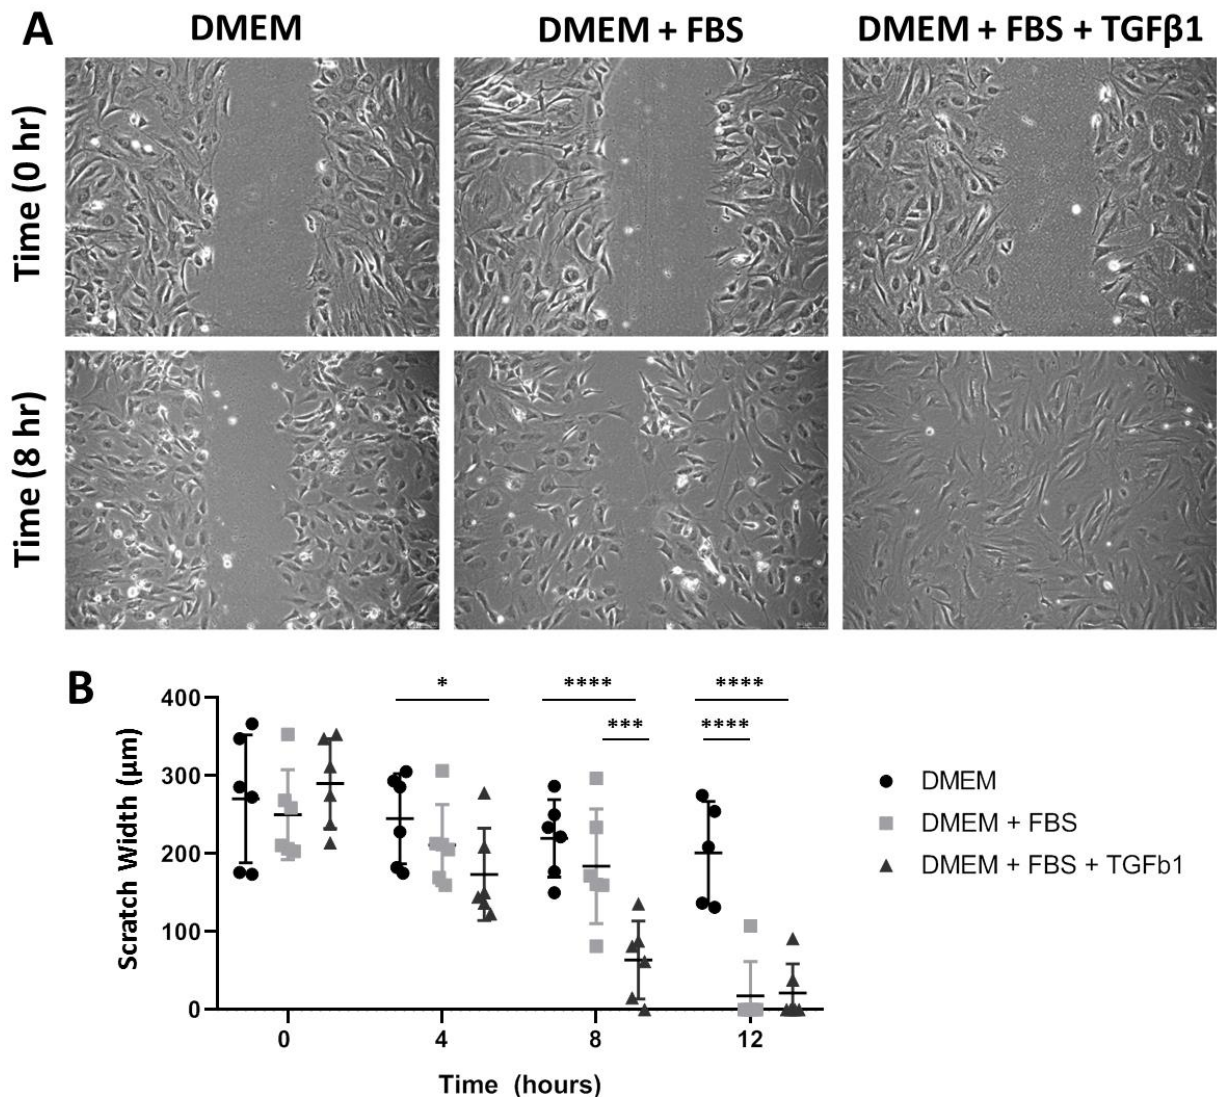

208 **Figure 5: TGF $\beta$  enhances neonatal tenocyte migration *in vitro*.** (A) Phase contrast images and (B)  
209 quantification of *in vitro* wound assay show rapid closure with TGF $\beta$ 1 supplementation relative to  
210 DMEM and DMEM+FBS conditions (n=6). \* p<0.05, \*\*\* p<0.001, \*\*\*\* p<0.0001.  
211

212

213 Increased TGF $\beta$  ligand production in injured tendon depends on TGF $\beta$  signaling

214 Although *Scx<sup>flin</sup>* cells are not present in the gap space at d3, the region is not devoid of cells. At this time,  
215 we observed early accumulation of  $\alpha$ SMA+ cells that are not from the *Scx<sup>flin</sup>* (Howell et al., 2017).  
216 Surprisingly, immunostaining for  $\alpha$ SMA revealed that recruitment of  $\alpha$ SMA+ cells at d3 was not affected  
217 by TGF $\beta$  inhibition or *TBR2* deletion (**Figure 6A, B**). Transverse sections through the midsubstance gap  
218 space also confirmed that *Scx<sup>flin</sup>* cells were not yet detectable at d3 in any condition (not shown). The  
219 presence of  $\alpha$ SMA+ cells within the gap space prior to *Scx<sup>flin</sup>* cell recruitment suggested that these cells  
220 may be a source of TGF $\beta$  ligands that signal to tenocytes for migration. Immunostaining for all three  
221 TGF $\beta$  isoforms showed comparable levels of signal between gap space cells and control tendon (**Figure**  
222 **S3**). We considered the possibility that ligand production may be regulated by TGF $\beta$  signaling and that  
223 reduced presence of TGF $\beta$  ligands may prevent tenocyte recruitment. However, immunostaining for  
224 TGF $\beta$  ligands showed equivalent staining intensity within the gap space for carrier- and SB-431542-  
225 treated limbs (**Figure S3**). Differences were only observed in injured tendons; we found increased  
226 staining of ligands for carrier-treated injured tendons, but this increase was not detected with SB-  
227 431542 treatment (**Figure 7A, B**). This data suggests that TGF $\beta$  signaling is required for upregulation of  
228 TGF $\beta$  ligands with injury, and that this is likely autonomously regulated in tenocytes.

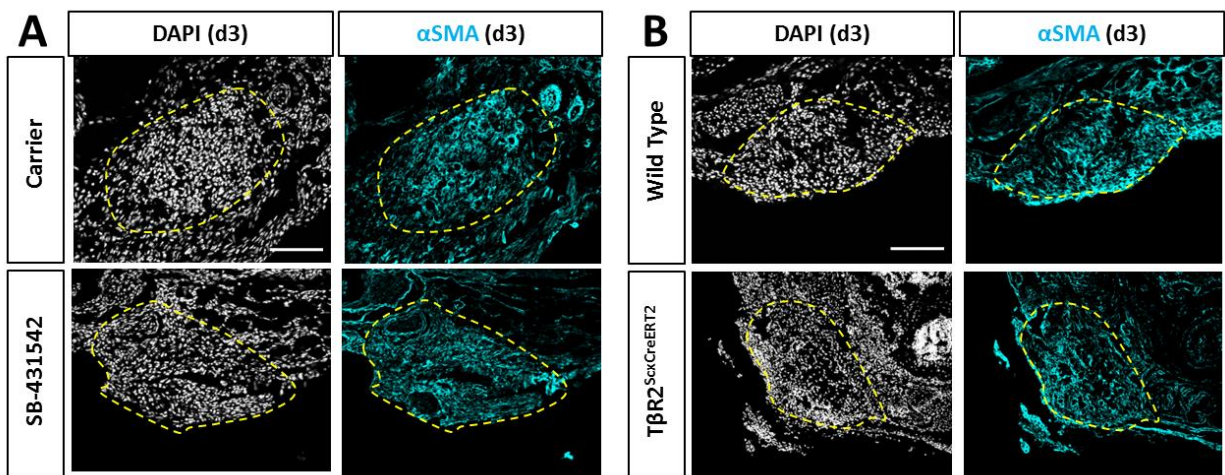

229  
230 **Figure 6: Recruitment of  $\alpha$ SMA+ myofibroblasts is not affected by TGF $\beta$  inhibition or *TBR2<sup>Scx</sup>* deletion.**  
231 Transverse sections through the gap space at d3 showed abundant  $\alpha$ SMA+ cells with (A) SB-431542  
232 treatment or (B) *TBR2<sup>Scx</sup>* deletion at levels comparable to carrier-treated or wild type. Yellow dashed  
233 outlines highlight gap area formerly occupied by the Achilles tendon.

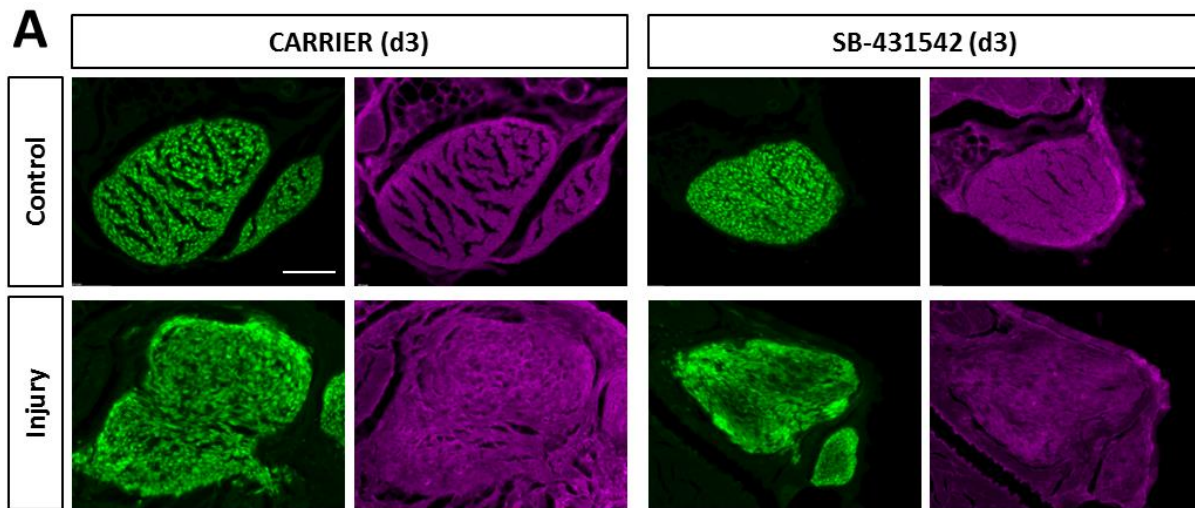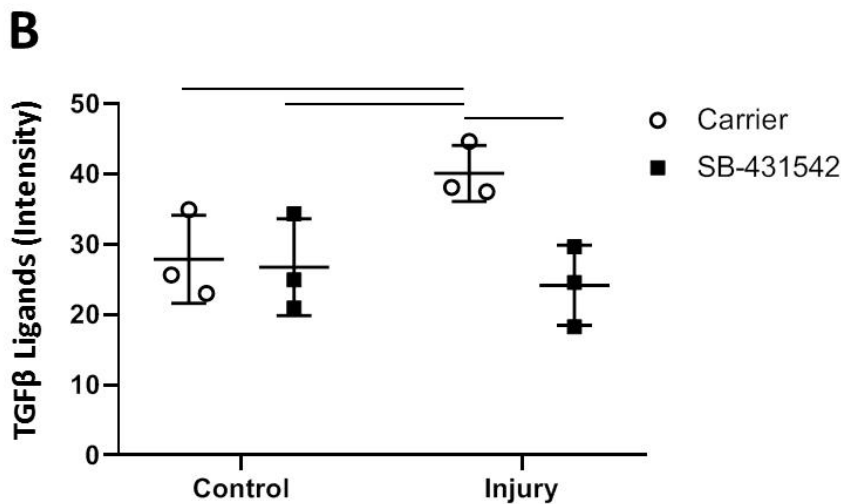

234  
 235 **Figure 7: TGFβ ligand synthesis after injury is regulated by TGFβ signaling.** (A) Transverse sections  
 236 through the tendon at d3 immunostained with antibody against all three TGFβ isoforms. (B)  
 237 Quantification of intensity levels show increased TGFβ ligands after injury in carrier-treated tendons that  
 238 is no longer observed with SB-431542 treatment. Bars indicate p<0.05. Scalebar: 100 μm.

239

240 Non-Scx<sup>lin</sup> tenogenic cells also contribute to neotendon formation

241 Although αSMA+ cells are present at d3, immunostaining showed few αSMA+ cells by d14 for all  
 242 experimental conditions (Figure S4), consistent with our previous study (Howell et al., 2017). We  
 243 hypothesized that αSMA+ cells (which are not Scx<sup>lin</sup>) may differentiate toward the tendon lineage and  
 244 turn off αSMA. This is supported by previous studies using αSMACreERT2, which showed that αSMA<sup>lin</sup>  
 245 cells of the paratenon turn on ScxGFP with adult patellar tendon injury (Dyment et al., 2013). Analysis of  
 246 ScxGFP expression in carrier-treated injured limbs indeed showed a population of non-Scx<sup>lin</sup>, ScxGFP+  
 247 cells comprising the neo-tendon (Figure 8A, B). Comparison to contralateral non-injured controls  
 248 indicated that incomplete recombination of Scx<sup>lin</sup> cells does not explain this phenomenon since

249 recombination efficiency is ~96.4% in control tendons. Quantification of the non-*Scx<sup>lin</sup>* *ScxGFP*+ (*ScxGFP*  
 250 only) population showed fewer *ScxGFP* only cells in the neo-tendon after injury in SB-431542-treated  
 251 mice (**Figure 8C-E**). There was a proportional decrease in DAPI+ cells, indicating that the reduction in  
 252 *ScxGFP* only cells was probably not due to failure of cells within the gap space to differentiate. Rather,  
 253 the cells that comprise this population are either not recruited or experience reduced proliferation in  
 254 the absence of TGF $\beta$  signaling. To determine whether these non- *Scx<sup>lin</sup>*, *ScxGFP*+ cells were derived from  
 255  $\alpha$ SMA+ cells, we used the transgenic  $\alpha$ SMA*CreERT2* mouse and labeled cells by tamoxifen administered  
 256 at P2, P3. Analysis of transverse cryosections at P5 showed an unexpected amount of recombination in  
 257 *ScxGFP* tenocytes (**Figure S5**). Immunostaining with anti- $\alpha$ SMA confirmed that neonatal tenocytes  
 258 normally do not express  $\alpha$ SMA. The surprising extent of tendon cell recombination with the  
 259  $\alpha$ SMA*CreERT2* therefore precluded its use in identifying the source of non-*Scx<sup>lin</sup>* *ScxGFP*+ cells after  
 260 injury.

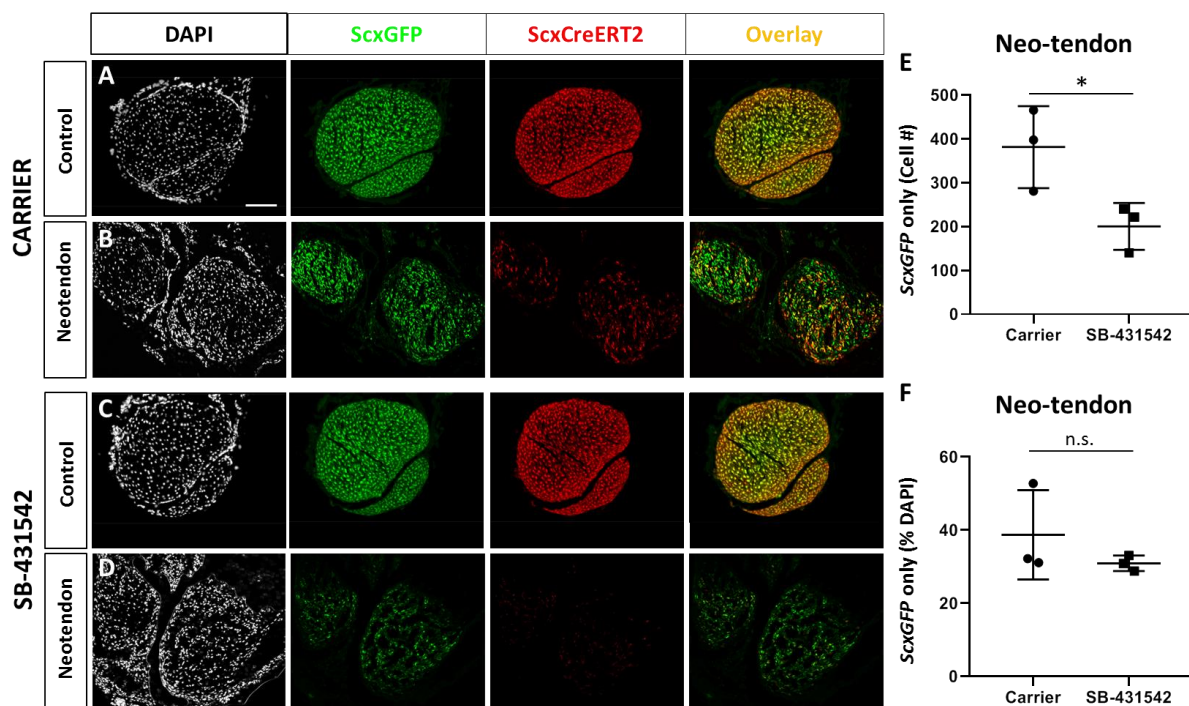

261  
 262 **Figure 8: TGF $\beta$  ligand synthesis after injury is regulated by TGF $\beta$  signaling.** Transverse sections through  
 263 the neo-tendon of control and injured limbs in (A, B) carrier-treated and (C, D) SB-431542-treated  
 264 *Scx<sup>CreERT2</sup>/RosaT/ScxGFP* mice. (E, F) Quantification of non-*Scx<sup>lin</sup>*, *ScxGFP*+ cells show reduction in cell  
 265 number with SB-431542 treatment but not when normalized to total DAPI+ cells (n=3 mice). \* p<0.05.  
 266 n.s. indicates p>0.1. Scalebar: 100  $\mu$ m.

267

268 To test whether tendon-specific differentiation is affected, we also determined gene expression by real  
 269 time qPCR at d3 and d14 post-injury. At d3, injured limbs from carrier-treated mice decreased tendon  
 270 markers *Scx*, *Mkx* and *Tnmd* compared to their contralateral uninjured controls (**Figure 9A**).  
 271 Interestingly, SB-431542-treatment also decreased tendon gene expression in uninjured control tendons  
 272 relative to carrier controls. Additional decreases with injury were not detected between injured and  
 273 control tendons with TGF $\beta$  inhibition. By d14, tendon gene expression was similar across all samples  
 274 regardless of treatment or injury (**Figure 9B**). Expression levels of *Sox9* and *Acta2* (the gene for  $\alpha$ SMA)  
 275 were not different across experimental conditions at either timepoint (**Figure 9A, B**). These data indicate  
 276 that despite defects in tenogenic cell recruitment, tendon gene expression after injury was largely not  
 277 affected by TGF $\beta$  inhibition.

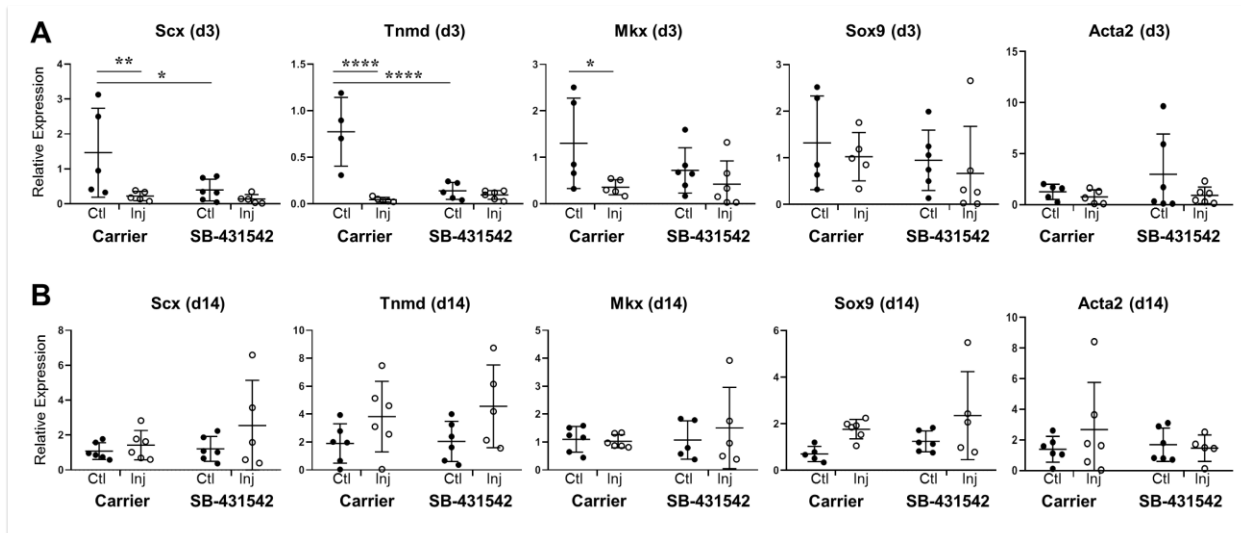

278 **Figure 9: Tendon gene expression is not affected by TGF $\beta$  inhibition at d14 post-injury.** Real time qPCR  
 279 analysis of tendons harvested at (A) d3 and (B) d14 from carrier-treated and SB-431542-treated animals  
 280 (n=4-6 mice). Tendon genes were decreased after injury in carrier-treated mice but not with SB-431542  
 281 treatment at d3. Differences were no longer detected by d14. Cartilage and myofibroblast markers were  
 282 not significantly different. \* p < 0.05, \*\* p < 0.01, \*\*\*\* p < 0.0001.

284

285 Taken together, our results reveal TGF $\beta$ -dependent and TGF $\beta$ -independent processes during neonatal  
 286 tendon regeneration. While early proliferation of *Scx*<sup>flin</sup> tenocytes and activation of extrinsic  $\alpha$ SMA+  
 287 myofibroblasts do not depend on TGF $\beta$ , subsequent recruitment of tenogenic cells (from *Scx*<sup>flin</sup> and non-  
 288 *Scx*<sup>flin</sup> sources) and functional restoration depend on TGF $\beta$  signaling (**Figure 10**).

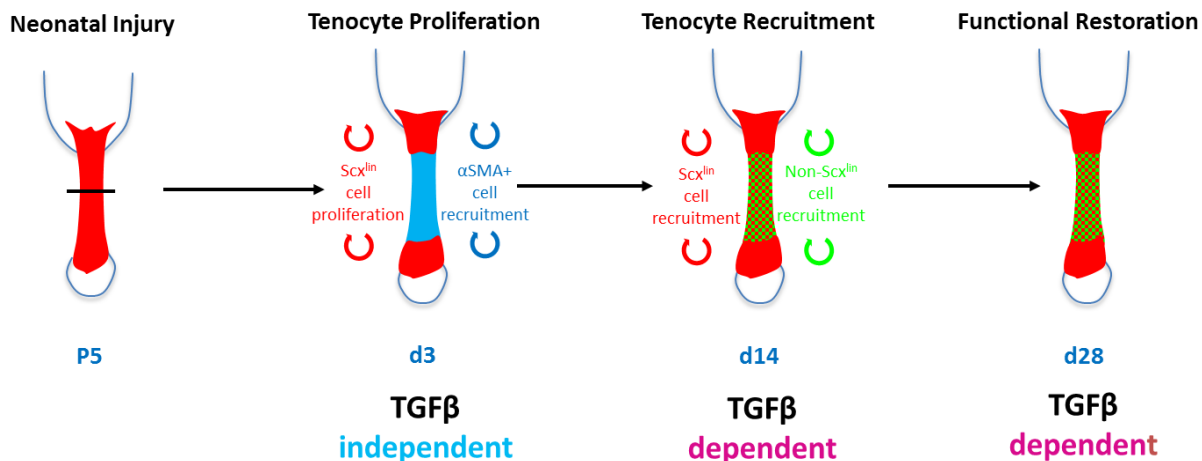

289  
290 **Figure 10: Requirement for TGF $\beta$  signaling in neonatal regeneration.** Conceptual model schematic  
291 depicting the TGF $\beta$ -dependent and TGF $\beta$ -independent cellular processes during neonatal tendon  
292 regeneration. While tenocyte proliferation and  $\alpha$ SMA cell recruitment at d3 occur independently of  
293 TGF $\beta$  signaling, tenogenic cell recruitment and functional restoration at subsequent timepoints require  
294 TGF $\beta$ .

295

## 296 DISCUSSION

297 TGF $\beta$  signaling is a known regulator of many cellular processes, including proliferation, survival,  
298 migration, and differentiation (Shi & Massague, 2003). In tendon, TGF $\beta$  signaling is essential in  
299 embryonic tendon development as well as induction and maintenance of tendon cell fate (Brian A. Pryce  
300 et al., 2009). However, this pathway is also strongly identified with fibrotic, scar-mediated healing and  
301 excessive TGF $\beta$  signaling results in tenocyte apoptosis (Davies et al., 2016; Katzel et al., 2011). In the  
302 context of tendon regeneration, it was therefore unclear whether TGF $\beta$  would be required for  
303 tenogenesis or whether activation of TGF $\beta$  would drive fibrotic responses. Using our previously  
304 established model of neonatal tendon regeneration, we now show that TGF $\beta$  signaling is enhanced after  
305 injury and is required in neonatal tenocytes for their recruitment. Since tenocyte proliferation was not  
306 affected, we propose that tenocyte-mediated regeneration requires active migration of cells to bridge  
307 the gap space. This is further supported by *in vitro* data showing enhanced migrational capacity of  
308 neonatal tenocytes in the presence of TGF $\beta$  ligand and is consistent with several studies in the literature  
309 for other cell types (Shi & Massague, 2003).

310 In addition to intrinsic tenocytes, we also identified a second population of non-*Scx<sup>lin</sup>*, *ScxGFP<sup>+</sup>* cells that  
311 are also recruited to the gap space. Inhibition of TGF $\beta$  signaling also resulted in reduced numbers of  
312 these cells. One potential source of these cells may be the epitenon as it was previously proposed that  
313 tendon stem/progenitor cells reside in epitenon (Dyment et al., 2014; Dyment et al., 2013; Gumucio,  
314 Phan, Ruehlmann, Noah, & Mendias, 2014; Mendias, Gumucio, Bakhurin, Lynch, & Brooks, 2012;  
315 Mienaltowski, Adams, & Birk, 2013). Although lineage tracing with  $\alpha$ SMACreERT2 showed restricted  
316 labeling in the epitenon/paratenon in adults (Dyment et al., 2014), we found considerable labeling in  
317 tenocytes at neonatal stages which precluded the use of this line to target epitenon-derived cells.  
318 Another source may be nearby vasculature, as CD146+ pericytes have been identified for tendon (Lee et  
319 al., 2015). Despite impaired recruitment of tenogenic cells with TGF $\beta$  inhibition, the expression of

320 tenogenic markers *Scx*, *Tnmd*, and *Mkx* were not different at d14. Identifying additional markers for  
321 tendon cell fate is the focus of ongoing studies.

322 Unexpectedly, we found that early activation of  $\alpha$ SMA+ myofibroblasts is not affected when TGF $\beta$   
323 signaling is inhibited. While myofibroblast phenotypes were not expected in *TBR2*<sup>Scx</sup> mutants (since *Scx*  
324 lineage tracing showed that myofibroblasts did not derive from tenocytes), we were surprised to  
325 observe abundant myofibroblast accumulation with global SB-431542 inhibition. Since TGF $\beta$  signaling is  
326 well-established in myofibroblast induction and survival, these results suggest that our inhibition  
327 protocol likely did not abrogate all TGF $\beta$  signaling and there may be different thresholds required for  
328 TGF $\beta$ -dependent myofibroblast activation versus tenocyte recruitment. Alternatively, other signaling  
329 pathways have also been implicated in myofibroblast activation in the absence of TGF $\beta$ , including CTGF,  
330 EGF, and IGF2 (Grotendorst, Rahmanie, & Duncan, 2004). Interestingly, CTGF can induce tendon  
331 differentiation of adipose derived stem cells and delivery of CTGF improves adult tendon healing by  
332 activating endogenous stem cells (Lee et al., 2015; Thomopoulos et al., 2015). Identifying the role of  
333 CTGF and other pathways in neonatal regeneration may provide additional insights in poor adult tendon  
334 healing.

335 We identified a potential source of TGF $\beta$  ligands in myofibroblasts within the gap space, which may  
336 drive directional migration of the tenocytes from the stubs. Although abundant TGF $\beta$ s were also  
337 detected in the tendon matrix of uninjured controls, these ligands may be in an inactive state since  
338 TGF $\beta$ s are typically secreted in a latent form bound to the extracellular matrix. Release of TGF $\beta$ s to its  
339 active form can be induced by proteases or mechanically (such as with transection injury) (Maeda et al.,  
340 2011). We detected an increase in tendon TGF $\beta$  ligands after injury, which was suppressed by small  
341 molecule inhibition of TGF $\beta$  signaling. This suggests that initiation of TGF $\beta$  signaling (possibly by release  
342 of TGF $\beta$ s from the matrix with transection) results in positive feedback in tenocytes. Other sources of  
343 TGF $\beta$ s may be immune cells, which are also known to produce TGF $\beta$ s. Of the three TGF $\beta$  isoforms, gene  
344 expression data suggested that the primary ligands driving neonatal regeneration may be TGF $\beta$ s 1 and 3.  
345 Although TGF $\beta$ 1 showed bimodal upregulation pattern, TGF $\beta$ 3 was consistently upregulated after injury.  
346 During embryonic development, TGF $\beta$ s 2 and 3 are expressed in tendons and allelic deletion of these  
347 ligands results in increasing loss of tendons (Kuo et al., 2008; Brian A. Pryce et al., 2009); in the context  
348 of injury, TGF $\beta$ 3 is expressed during regenerative fetal tendon healing in sheep while TGF $\beta$ 1 is  
349 associated with fibrotic adult tendon healing (Beredjiklian et al., 2003; Kim et al., 2011). Although this  
350 supports the notion that TGF $\beta$ s 2 and 3 are pro-tenogenic relative to TGF $\beta$ 1, it is unclear whether the  
351 individual ligands actually can activate distinct healing or tenogenic responses. Additional research must  
352 therefore be carried out to elucidate their activities.

353 Although adult tendon healing was not determined in this study, it is well established that TGF $\beta$   
354 signaling is elevated after adult injury and results in fibrotic scar formation. Inhibition of TGF $\beta$  signaling,  
355 either with neutralizing antibodies or via *Smad3*<sup>-/-</sup> deletion attenuates fibrosis but fail to regenerate  
356 tendon structure or function (Katzel et al., 2011; Kim et al., 2011). We previously showed that adult  
357 tenocytes are largely quiescent after full transection injury with minimal cell proliferation or  
358 recruitment. The distinctive response of neonatal vs adult tenocytes to TGF $\beta$  may reflect differences in  
359 intrinsic potential (for example adult tenocytes are post-mitotic) or the activation of other signaling  
360 pathways that may interact with or modify TGF $\beta$  signaling. In addition to Smad signaling, TGF $\beta$ s can also  
361 activate a number of non-Smad pathways; there may be differences in downstream signaling between  
362 neonatal and adult tenocytes. Using an *in vitro* engineered tendon model, we previously showed that  
363 the tenogenic outcomes of TGF $\beta$  signaling did not depend on *Smad4* (Chien, Pryce, Tufa, Keene, &  
364 Huang, 2018). Whether this finding is applicable in the context of *in vivo* injury remains to be  
365 determined.

366 Interestingly, while adult tenocytes fail to undergo tenogenic recruitment, a subset of adult tenocytes  
367 differentiate along the cartilage lineage, followed by heterotopic ossification (HO) (Howell et al., 2017).  
368 This process is not observed during neonatal tendon healing. Inhibition of BMP signaling reduces HO  
369 formation in adult tendons, however HO is not completely abolished (Zhang et al., 2016). Although TGF $\beta$   
370 is a strong tendon inducer, it is also widely used to induce chondrogenesis in mesenchymal stem cells.  
371 During embryonic development, TGF $\beta$  also induces a bipotent population of *Scx*+/*Sox9*+ progenitor cells  
372 that subsequently contribute to the cartilage and tendon cells of the tendon-skeletal attachment (Blitz,  
373 Sharir, Akiyama, & Zelzer, 2013). Whether TGF $\beta$  signaling may also play a role in adult tendon HO will be  
374 the focus of future studies.

375

## 376 **METHODS**

### 377 Experimental procedures

378 The following mouse lines were used: *ScxGFP* tendon reporter (B. A. Pryce, Brent, Murchison, Tabin, &  
379 Schweitzer, 2007), *ScxCreERT2* (generated by R. Schweitzer),  *$\alpha$ SMACreERT2* (Grcevic et al., 2012), *Ai14*  
380 *Rosa26-TdTomato* Cre reporter (Madisen et al., 2010), and *TBR2<sup>fl/fl</sup>* (Chytil, Magnuson, Wright, & Moses,  
381 2002). Lineage tracing and Cre deletion was performed by delivering tamoxifen in corn oil to neonatal  
382 mice at P2 and P3 (1.25 mg/pup) (Howell et al., 2017). EdU was given at 0.05 mg 2 hours prior to harvest  
383 to label proliferating cells. Global TGF $\beta$  inhibition was carried out using the well-established small  
384 molecule inhibitor SB-431542 (10 mg/kg, intraperitoneal injection) which targets the TGF $\beta$  family type I  
385 receptors ALK 4/5/7 (Hamilton, Foster, & Bonnet, 2014; Inman et al., 2002; Laping et al., 2002; Lemos et  
386 al., 2015; Waghbi et al., 2009). Daily injections of SB-431542 were administered from day 0-14 after  
387 injury. Full Achilles tendon transection without repair was carried out in neonates at P5, with male and  
388 female mice distributed evenly between groups. All procedures were approved by the Institutional  
389 Animal Care and Use Committee at Mount Sinai.

### 390 Migration assay

391 Neonatal tenocytes were isolated from P7 pups by digestion in 1% collagenase type 1 (Cat. # LS004188,  
392 Worthington, Lakewood, NJ) and collagenase type 4 (Cat. # LS004188, Worthington, Lakewood, NJ) for 4  
393 hours. Cells were expanded and maintained in high glucose DMEM (Cat. # 11965092, Life Technologies,  
394 Carlsbad, CA) with 10% fetal bovine serum (FBS, Life Technologies, Carlsbad, CA) and 1% PenStrep (Life  
395 Technologies, Carlsbad, CA). For the migration assay, cells were maintained in DMEM only, DMEM+10%  
396 FBS, or DMEM+10% FBS+10 ng/mL TGF $\beta$ 1 (Cat. # 240-B, R&D Systems, Minneapolis, MN). A P200 tip was  
397 used scratch down the midline of every well. Phase contrast images were then taken every 4 hours for a  
398 total of 12 hours.

### 399 Whole mount fluorescence imaging

400 Hindlimbs were fixed in 4% paraformaldehyde (PFA, Cat. # 50-980-495, Fisher Scientific, Waltham, MA)  
401 overnight at 4°C and skin removed to expose the Achilles tendon. Whole mount images of the posterior  
402 limbs were captured using a Leica M165FC stereomicroscope with fluorescence capabilities. Exposure  
403 settings were maintained across limbs.

404

405

406



#### 407 Immunofluorescence and microscopy

408 After sacrifice, limbs were fixed in 4% PFA for 24 hours at 4°C, decalcified in 50 mM EDTA for 1-2 weeks  
409 at 4°C, then incubated in 5% sucrose (1 hour) and 30% sucrose (overnight) at 4°C. Limbs were then  
410 embedded in optimal cutting temperature medium (Cat. # 23-730, Fisher Scientific, Waltham, MA) and  
411 12  $\mu$ m transverse cryosections obtained. Immunostaining was carried out with primary antibodies  
412 against  $\alpha$ SMA (Cat. # A5228, Sigma, St. Louis, MI), TGF $\beta$  1,2,3 ligands (Cat. # MAB1835, R&D Systems,  
413 Minneapolis, MN) and secondary detection with antibodies conjugated to Cy5 (Cat. # 711-175-152; 016-  
414 170-084, Jackson ImmunoResearch, West Grove, PA). EdU labeling was detected with the Click it EdU kit  
415 in accordance with manufacturer's instructions (Cat. # C10340, Life Technologies, Carlsbad, CA).  
416 Fluorescence images were acquired using the Zeiss Axio Imager with optical sectioning by Apotome or  
417 using the Leica DMB6 microscope. Cell quantification was performed in Zeiss Zen or Image J software on  
418 transverse cryosection images. All images for quantifications were taken at the same exposure and  
419 image manipulations applied equally across samples.

#### 420 RNA isolation, reverse transcription, and qRT-PCR

421 Trizol/chloroform extraction was used to isolate RNA from dissected tendons. cDNA was then  
422 synthesized via reverse transcription using the SuperScript VILO master mix (Cat. # 11755050,  
423 Invitrogen, Carlsbad, CA). Gene expression was assessed by qRT-PCR using SYBR PCR Master Mix (Cat. #  
424 4309155, Thermo Fisher, Waltham, MA) and calculated using the standard curve method or the  $2^{-\Delta\Delta C_t}$   
425 method relative to carrier-treated control tendons. The housekeeping gene, *Gapdh*, was used to  
426 normalize gene expression. Primer sequences for TGF $\beta$ -related molecules are listed in **Supplemental**  
427 **Table 1**. All other primers were previously described (Howell+, Sci Rep, 2017).

#### 428 Gait analysis

429 Mice were gaited at 10 cm/s for 3-4 s using the DigiGait Imaging System (Mouse Specifics Inc., Quincy,  
430 MA). A high-speed digital camera was used to capture forelimb paw positions and parameters previously  
431 established for mouse Achilles tendon injury were then extracted (Howell+, Sci Rep, 2017). All  
432 parameters were normalized to Stride length to account for differences in animal size and age.

#### 433 Biomechanical testing

434 Tensile testing was performed in PBS at room temperature using custom 3D printed grips to secure the  
435 calcaneus bone and Achilles tendon (Abraham et al., 2019). Tendons were preloaded to 0.05N for  $\sim$ 1  
436 min followed by ramp to failure at 1%/s. Structural properties were recorded; since cross-sectional area  
437 could not be accurately measured due to the small size of the tissues, material properties were not  
438 analyzed.

#### 439 Statistical analysis

440 Quantitative results are presented as mean $\pm$ standard deviation. Two way ANOVA was used for  
441 comparisons with two independent variables (injury and TGF $\beta$  inhibition); where significance was  
442 detected, posthoc testing was then carried out (Graphpad Prism). All other quantitative analyses were  
443 analyzed using Students t-tests. Significant outliers were detected using Grubb's test (Graphpad Prism).  
444 Sample sizes for gait and mechanical properties quantification were calculated from power analyses  
445 with power 0.8 and 5% type I error. Samples sizes for other quantitative data were used based on  
446 previous data from the lab and published literature. Significance was determined at  $p < 0.05$ .

447 **ACKNOWLEDGMENTS**

448 This work was supported by NIH/NIAMS R01AR069537 to AHH and F31AR073626 to DK. We also would  
449 like to acknowledge Bhavita Walia for experimental assistance.  
450

451 **COMPETING INTERESTS**

452 There are no competing interests

453

454 **REFERENCES**

- 455 Abraham, A. C., Shah, S. A., Golman, M., Song, L., Li, X., Kurtaliaj, I., . . . Thomopoulos, S. (2019).  
456 Targeting the NF- $\kappa$ B signaling pathway in chronic tendon disease. *Science Translational*  
457 *Medicine*, *11*(481), eaav4319. doi:10.1126/scitranslmed.aav4319
- 458 Ackerman, J. E., Studentsova, V., Myers, M., Buckley, M. R., Richards, M. S., & Loisel, A. E. (2019). Non-  
459 Invasive Ultrasound Quantification of Scar Tissue Volume Identifies Early Functional Changes  
460 During Tendon Healing. doi:10.1002/jor.24397
- 461 Beredjikian, P. K., Favata, M., Cartmell, J. S., Flanagan, C. L., Crombleholme, T. M., & Soslow, L. J.  
462 (2003). Regenerative Versus Reparative Healing in Tendon: A Study of Biomechanical and  
463 Histological Properties in Fetal Sheep. *Annals of Biomedical Engineering*, *31*(10), 1143-1152.  
464 doi:10.1114/1.1616931
- 465 Blitz, E., Sharir, A., Akiyama, H., & Zelzer, E. (2013). Tendon-bone attachment unit is formed modularly  
466 by a distinct pool of Scx- and Sox9-positive progenitors. *Development*, *140*(13), 2680-2690.  
467 doi:10.1242/dev.093906
- 468 Border, W. A., & Noble, N. A. (1994). Transforming growth factor beta in tissue fibrosis. *N Engl J Med*,  
469 *331*(19), 1286-1292. doi:10.1056/nejm199411103311907
- 470 Brent, A. E., Schweitzer, R., & Tabin, C. J. (2003). A somitic compartment of tendon progenitors. *Cell*,  
471 *113*(2), 235-248. doi:10.1016/s0092-8674(03)00268-x
- 472 Brown, J. P., Galassi, T. V., Stoppato, M., Schiele, N. R., & Kuo, C. K. (2015). Comparative analysis of  
473 mesenchymal stem cell and embryonic tendon progenitor cell response to embryonic tendon  
474 biochemical and mechanical factors. *Stem Cell Res Ther*, *6*, 89. doi:10.1186/s13287-015-0043-z
- 475 Chien, C., Pryce, B., Tufa, S. F., Keene, D. R., & Huang, A. H. (2018). Optimizing a 3D model system for  
476 molecular manipulation of tenogenesis. *Connect Tissue Res*, *59*(4), 295-308.  
477 doi:10.1080/03008207.2017.1383403
- 478 Chytil, A., Magnuson, M. A., Wright, C. V., & Moses, H. L. (2002). Conditional inactivation of the TGF-beta  
479 type II receptor using Cre:Lox. *Genesis*, *32*(2), 73-75.
- 480 Davies, M. R., Liu, X., Lee, L., Laron, D., Ning, A. Y., Kim, H. T., & Feeley, B. T. (2016). TGF- $\beta$  Small  
481 Molecule Inhibitor SB431542 Reduces Rotator Cuff Muscle Fibrosis and Fatty Infiltration By  
482 Promoting Fibro/Adipogenic Progenitor Apoptosis. *PLoS One*, *11*(5), e0155486.  
483 doi:10.1371/journal.pone.0155486
- 484 Desmouliere, A., Geinoz, A., Gabbiani, F., & Gabbiani, G. (1993). Transforming growth factor-beta 1  
485 induces alpha-smooth muscle actin expression in granulation tissue myofibroblasts and in  
486 quiescent and growing cultured fibroblasts. *J Cell Biol*, *122*(1), 103-111.  
487 doi:10.1083/jcb.122.1.103
- 488 Dymant, N. A., Hagiwara, Y., Matthews, B. G., Li, Y., Kalajzic, I., & Rowe, D. W. (2014). Lineage tracing of  
489 resident tendon progenitor cells during growth and natural healing. *PLoS One*, *9*(4), e96113-  
490 e96113. doi:10.1371/journal.pone.0096113

- 491 Dymant, N. A., Liu, C.-F., Kazemi, N., Aschbacher-Smith, L. E., Kenter, K., Breidenbach, A. P., . . . Butler, D.  
492 L. (2013). The paratenon contributes to scleraxis-expressing cells during patellar tendon healing.  
493 *PLoS One*, *8*(3), e59944-e59944. doi:10.1371/journal.pone.0059944
- 494 Grcevic, D., Pejda, S., Matthews, B. G., Repic, D., Wang, L., Li, H., . . . Kalajic, I. (2012). In vivo fate  
495 mapping identifies mesenchymal progenitor cells. *Stem Cells*, *30*(2), 187-196.  
496 doi:10.1002/stem.780
- 497 Grotendorst, G. R., Rahmanie, H., & Duncan, M. R. (2004). Combinatorial signaling pathways determine  
498 fibroblast proliferation and myofibroblast differentiation. *FASEB J*, *18*(3), 469-479.  
499 doi:10.1096/fj.03-0699com
- 500 Gumucio, J. P., Phan, A. C., Ruehlmann, D. G., Noah, A. C., & Mendias, C. L. (2014). Synergist ablation  
501 induces rapid tendon growth through the synthesis of a neotendon matrix. *117*(11), 1287-1291.  
502 doi:10.1152/jappphysiol.00720.2014
- 503 Hamilton, A., Foster, K., & Bonnet, D. (2014). Impairment of AML Engraftment to the Bone Marrow  
504 Niche Following Inhibition of TGF-Beta Signaling. *Blood*, *124*(21), 4372-4372.
- 505 Havis, E., Bonnin, M.-A., Esteves de Lima, J., Charvet, B., Milet, C., & Duprez, D. (2016). TGF $\beta$  and FGF  
506 promote tendon progenitor fate and act downstream of muscle contraction to regulate tendon  
507 differentiation during chick limb development. *Development*, *143*(20), 3839-3851.  
508 doi:10.1242/dev.136242
- 509 Howell, K., Chien, C., Bell, R., Laudier, D., Tufa, S. F., Keene, D. R., . . . Huang, A. H. (2017). Novel Model of  
510 Tendon Regeneration Reveals Distinct Cell Mechanisms Underlying Regenerative and Fibrotic  
511 Tendon Healing. *Scientific Reports*, *7*, 45238. doi:10.1038/srep45238
- 512 <https://www.nature.com/articles/srep45238#supplementary-information>
- 513 Inman, G. J., Nicolas, F. J., Callahan, J. F., Harling, J. D., Gaster, L. M., Reith, A. D., . . . Hill, C. S. (2002). SB-  
514 431542 is a potent and specific inhibitor of transforming growth factor-beta superfamily type I  
515 activin receptor-like kinase (ALK) receptors ALK4, ALK5, and ALK7. *Mol Pharmacol*, *62*(1), 65-74.  
516 doi:10.1124/mol.62.1.65
- 517 Katzel, E. B., Wolenski, M., Loisele, A. E., Basile, P., Flick, L. M., Langstein, H. N., . . . O'Keefe, R. J. (2011).  
518 Impact of Smad3 loss of function on scarring and adhesion formation during tendon healing. *J*  
519 *Orthop Res*, *29*(5), 684-693. doi:10.1002/jor.21235
- 520 Kim, H. M., Galatz, L. M., Das, R., Havlioglu, N., Rothermich, S. Y., & Thomopoulos, S. (2011). The role of  
521 transforming growth factor beta isoforms in tendon-to-bone healing. *Connective Tissue*  
522 *Research*, *52*(2), 87-98. doi:10.3109/03008207.2010.483026
- 523 Kuo, C. K., Petersen, B. C., & Tuan, R. S. (2008). Spatiotemporal protein distribution of TGF-betas, their  
524 receptors, and extracellular matrix molecules during embryonic tendon development. *Dev Dyn*,  
525 *237*(5), 1477-1489. doi:10.1002/dvdy.21547
- 526 Laping, N. J., Grygielko, E., Mathur, A., Butter, S., Bomberger, J., Tweed, C., . . . Olson, B. A. (2002).  
527 Inhibition of transforming growth factor (TGF)-beta1-induced extracellular matrix with a novel  
528 inhibitor of the TGF-beta type I receptor kinase activity: SB-431542. *Mol Pharmacol*, *62*(1), 58-  
529 64. doi:10.1124/mol.62.1.58
- 530 Lee, C. H., Lee, F. Y., Tarafder, S., Kao, K., Jun, Y., Yang, G., & Mao, J. J. (2015). Harnessing endogenous  
531 stem/progenitor cells for tendon regeneration. *J Clin Invest*, *125*(7), 2690-2701.  
532 doi:10.1172/JCI81589
- 533 Lemos, D. R., Babaeijandaghi, F., Low, M., Chang, C.-K., Lee, S. T., Fiore, D., . . . Rossi, F. M. V. (2015).  
534 Nilotinib reduces muscle fibrosis in chronic muscle injury by promoting TNF-mediated apoptosis  
535 of fibro/adipogenic progenitors. *Nat Med*, *21*, 786. doi:10.1038/nm.3869
- 536 <https://www.nature.com/articles/nm.3869#supplementary-information>

- 537 Madisen, L., Zwingman, T. A., Sunkin, S. M., Oh, S. W., Zariwala, H. A., Gu, H., . . . Zeng, H. (2010). A  
538 robust and high-throughput Cre reporting and characterization system for the whole mouse  
539 brain. *Nat Neurosci*, *13*(1), 133-140. doi:10.1038/nn.2467
- 540 Maeda, T., Sakabe, T., Sunaga, A., Sakai, K., Rivera, A. L., Keene, D. R., . . . Sakai, T. (2011). Conversion of  
541 mechanical force into TGF-beta-mediated biochemical signals. *Curr Biol*, *21*(11), 933-941.  
542 doi:10.1016/j.cub.2011.04.007
- 543 Mass, D. P., & Tuel, R. J. (1991). Intrinsic healing of the laceration site in human superficialis flexor  
544 tendons in vitro. *The Journal of Hand Surgery*, *16*(1), 24-30. doi:[https://doi.org/10.1016/S0363-](https://doi.org/10.1016/S0363-5023(10)80006-1)  
545 [5023\(10\)80006-1](https://doi.org/10.1016/S0363-5023(10)80006-1)
- 546 Mendias, C. L., Gumucio, J. P., Bakhurin, K. I., Lynch, E. B., & Brooks, S. V. (2012). Physiological loading of  
547 tendons induces scleraxis expression in epitenon fibroblasts. *J Orthop Res*, *30*(4), 606-612.  
548 doi:10.1002/jor.21550
- 549 Mienaltowski, M. J., Adams, S. M., & Birk, D. E. (2013). Regional differences in stem cell/progenitor cell  
550 populations from the mouse achilles tendon. *Tissue Eng Part A*, *19*(1-2), 199-210.  
551 doi:10.1089/ten.TEA.2012.0182
- 552 Paredes, J., Shiovitz, D. A., & Andarawis-Puri, N. (2018). Uncorrelated healing response of tendon and  
553 ear injuries in MRL highlight a role for the local tendon environment in driving scarless healing.  
554 *Connective Tissue Research*, *59*(5), 472-482. doi:10.1080/03008207.2018.1485665
- 555 Pryce, B. A., Brent, A. E., Murchison, N. D., Tabin, C. J., & Schweitzer, R. (2007). Generation of transgenic  
556 tendon reporters, ScxGFP and ScxAP, using regulatory elements of the scleraxis gene. *Dev Dyn*,  
557 *236*(6), 1677-1682. doi:10.1002/dvdy.21179
- 558 Pryce, B. A., Watson, S. S., Murchison, N. D., Staverosky, J. A., Dünker, N., & Schweitzer, R. (2009).  
559 Recruitment and maintenance of tendon progenitors by TGFβ signaling are essential for tendon  
560 formation. *Development*, *136*(8), 1351-1361. doi:10.1242/dev.027342
- 561 Shi, Y., & Massague, J. (2003). Mechanisms of TGF-beta signaling from cell membrane to the nucleus.  
562 *Cell*, *113*(6), 685-700. doi:10.1016/s0092-8674(03)00432-x
- 563 Thomopoulos, S., Parks, W. C., Rifkin, D. B., & Derwin, K. A. (2015). Mechanisms of tendon injury and  
564 repair. *J Orthop Res*, *33*(6), 832-839. doi:10.1002/jor.22806
- 565 Voleti, P. B., Buckley, M. R., & Soslowsky, L. J. (2012). Tendon healing: repair and regeneration. *Annu Rev*  
566 *Biomed Eng*, *14*, 47-71. doi:10.1146/annurev-bioeng-071811-150122
- 567 Waghbi, M. C., de Souza, E. M., de Oliveira, G. M., Keramidias, M., Feige, J.-J., Araújo-Jorge, T. C., &  
568 Bailly, S. (2009). Pharmacological Inhibition of Transforming Growth Factor β Signaling  
569 Decreases Infection and Prevents Heart Damage in Acute Chagas' Disease. *Antimicrobial Agents*  
570 *and Chemotherapy*, *53*(11), 4694-4701. doi:10.1128/aac.00580-09
- 571 Zhang, K., Asai, S., Hast, M. W., Liu, M., Usami, Y., Iwamoto, M., . . . Enomoto-Iwamoto, M. (2016).  
572 Tendon mineralization is progressive and associated with deterioration of tendon biomechanical  
573 properties, and requires BMP-Smad signaling in the mouse Achilles tendon injury model. *Matrix*  
574 *Biol*, *52-54*, 315-324. doi:10.1016/j.matbio.2016.01.015

575

576

577 **SUPPLEMENTAL DATA**

578 **Supplemental Table 1: Primer sequences for real time qPCR**

| Gene  | FWD Primer            | REV Primer           |
|-------|-----------------------|----------------------|
| TβR2  | CCAAGTCGGATGTGGAAATGG | TGTCGCAAGTGGACAGTCTC |
| TGFβ1 | ACGTGGAAATCAACGGGATCA | AGAAGTTGGCATGGTAGCC  |
| TGFβ2 | CCCTCCGAAAATGCCATCC   | TGCTATCGATGTAGCGCTGG |
| TGFβ3 | ATGACCCACGTCCCCTATCA  | CAGACGGCCAGTTCATTGTG |

579

580

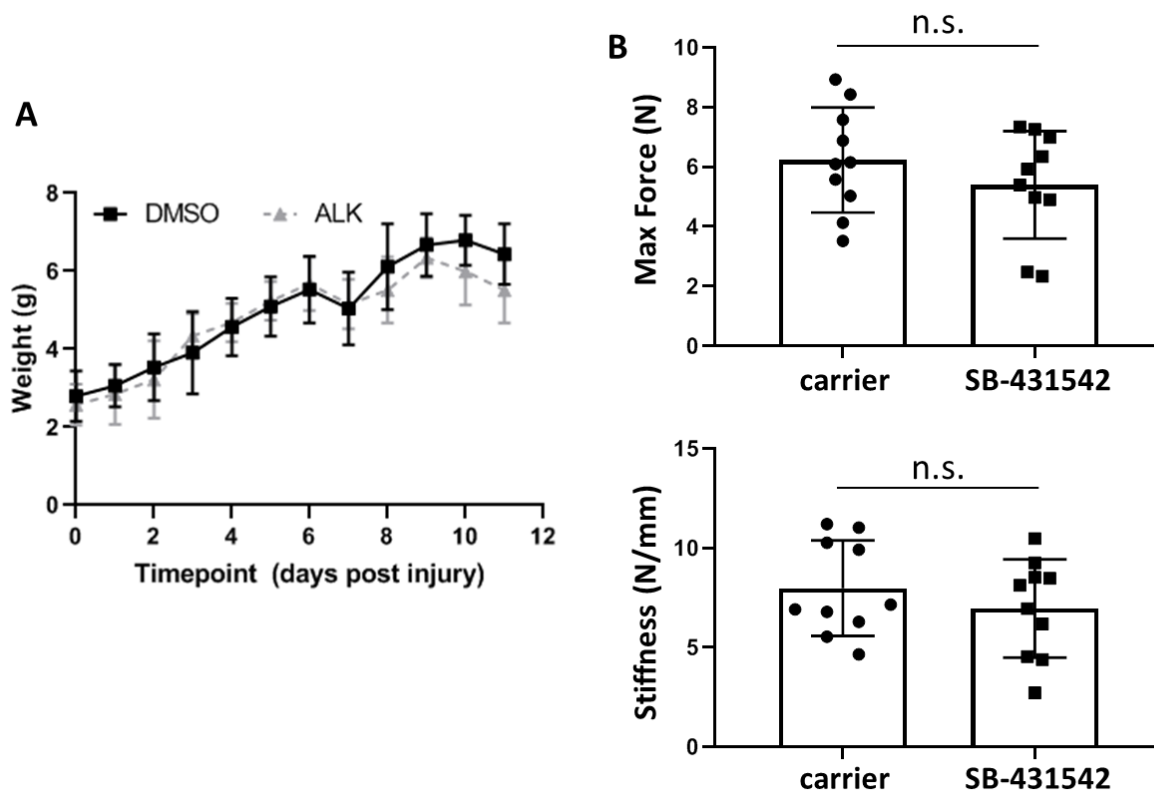

581  
582 **Figure S1: Postnatal growth is not affected by SB-431542 treatment.** (A) Weight and (B) tendon  
583 mechanical properties are comparable between carrier-treated and SB-431542-treated mice. n.s.  
584 indicates  $p > 0.1$ .

585

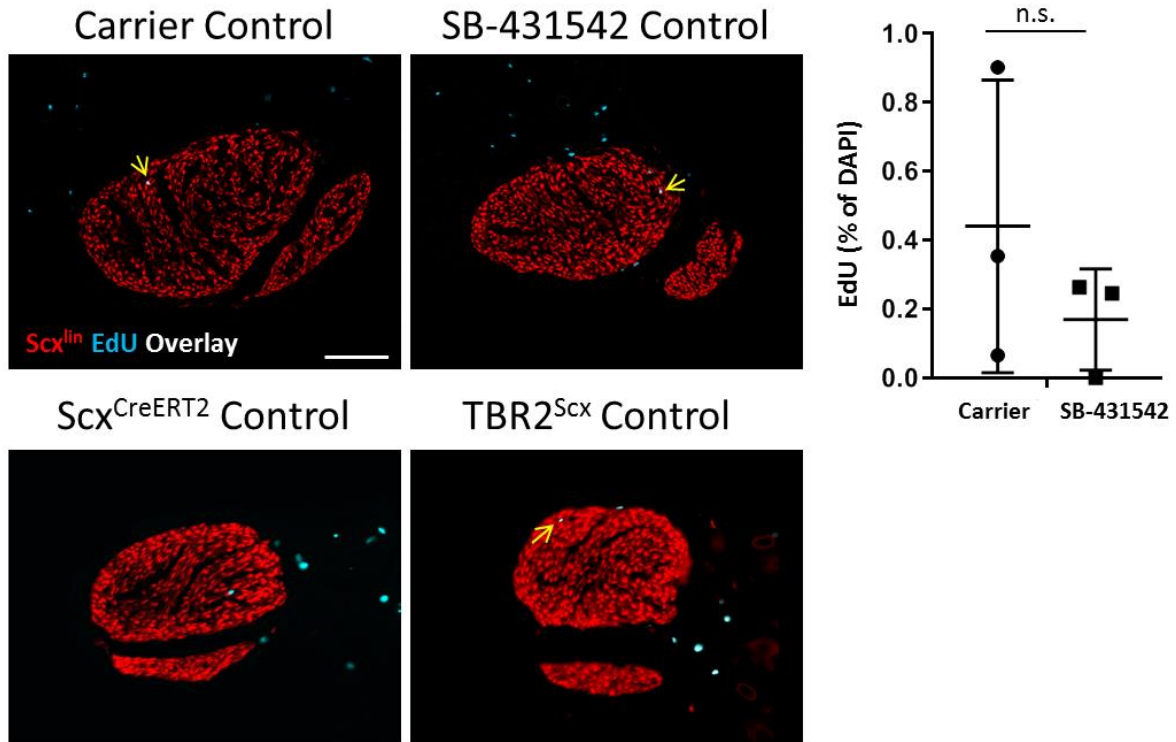

586  
587 **Figure S2: Proliferation in control, uninjured tendons is not affected by SB-431542 treatment or**  
588 ***TBR2*<sup>Scx</sup> deletion.** Transverse section images through control tendons stained with EdU show no  
589 differences between control tendons with SB-431542 treatment or *TBR2*<sup>Scx</sup>. Arrows indicate EdU+, *Scx*<sup>lin</sup>  
590 cells. Scalebar: 100  $\mu$ m.

591

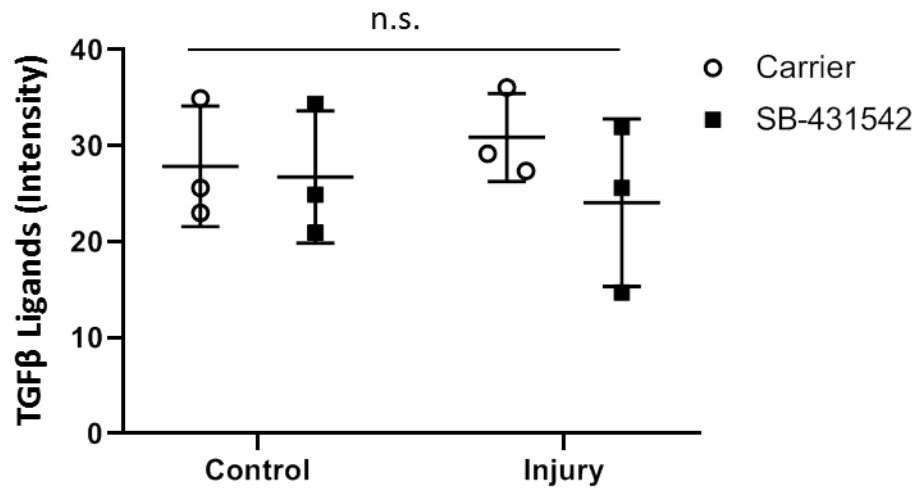

592

593 **Figures S3: TGFβ ligand within the gap space is not affected by SB-431542 treatment at d3.**

594 Quantification of TGFβ ligand immunostaining show no differences in intensity in the gap space with SB-  
595 431542 treatment (n=3). n.s. indicates  $p > 0.1$ . Scalebar: 100 μm.



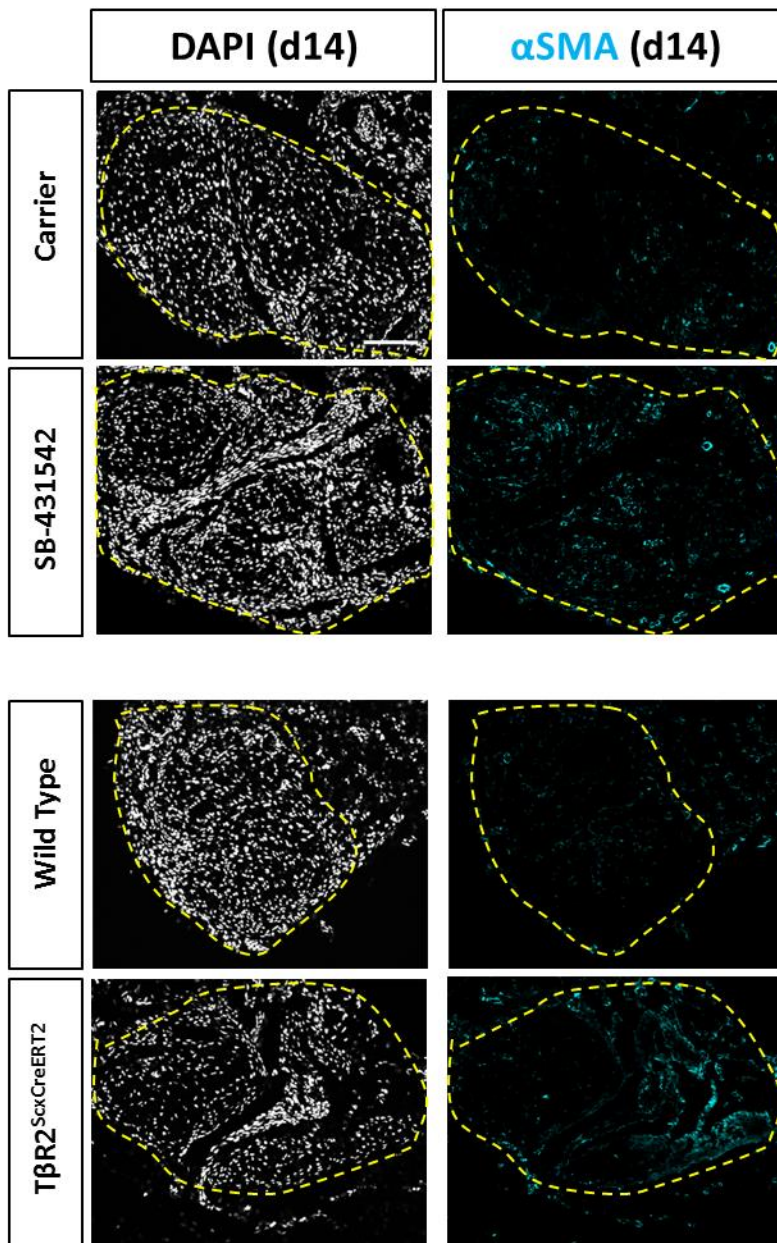

596

597 **Figure S4:  $\alpha$ SMA+ cells are minimally detected by d14 post-injury.** Transverse sections stained for  
598  $\alpha$ SMA show little staining for all samples. Dashed yellow outlines indicate neo-tendon region. Scalebar:  
599 100  $\mu$ m.

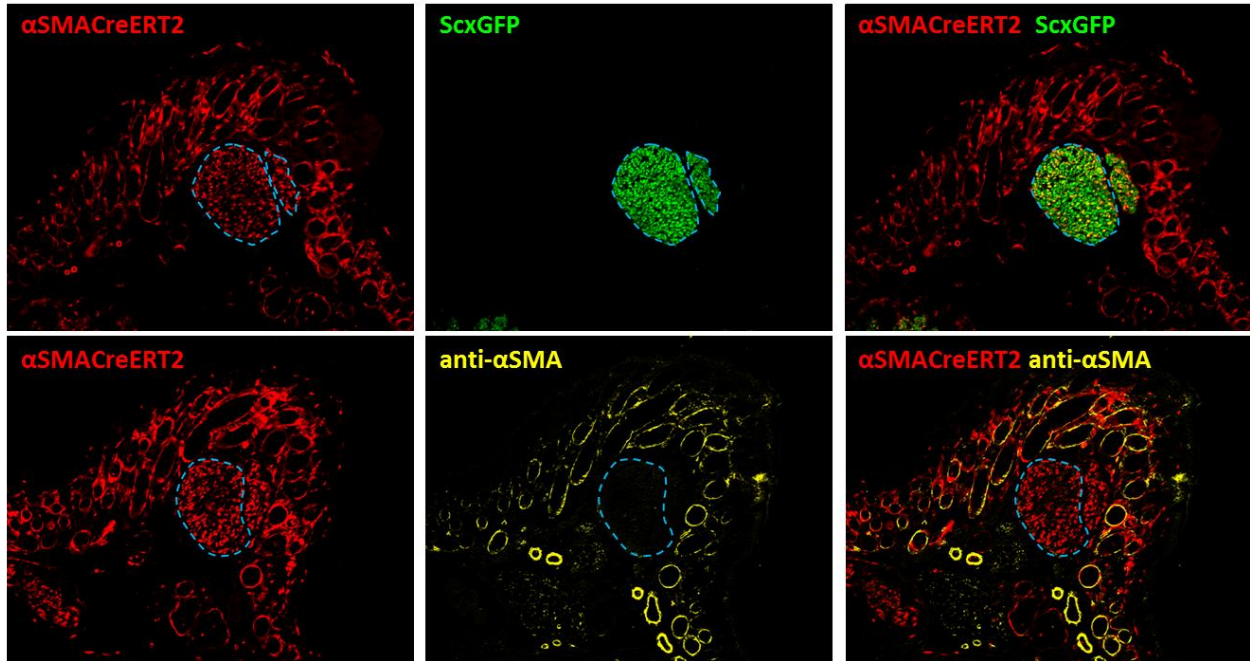

600

601 **Figure S5: Lineage tracing with  $\alpha$ SMACreERT2 show unexpected labeling in neonatal tenocytes.**

602 Tamoxifen delivered at P2, P3 with P5 harvest show extensive  $\alpha$ SMAin labeling in ScxGFP+ tenocytes

603 (blue dashed outlines). Immunostaining for  $\alpha$ SMA showed that tenocytes do not express  $\alpha$ SMA.

604 Overlays show extensive  $\alpha$ SMAin labeling and immunostaining in hair follicles (orange arrows) while

605 blood vessels are inconsistently labeled (green arrows).

606

607
